# Supplementary material for: Preparation of a porous polymer monolithic column with an ionic liquid as a porogen and its applications for the separation of small molecules in high performance liquid chromatography
Source: Royal Society of Chemistry journal article supplement (doi:10.1039/c5ay01487e), 2015-01-01
Supplement: c5ay01487e1.pdf [file c5ay01487e1.pdf]

## Electronic Supplementary Information (ESI)

**Fig. S1 Effect of mobile phase flow rate on the back pressure of columns E and F.**

Mobile phase: a: water, b: MeOH, c: ACN.

**Fig. S2 The pore size distribution curves of columns E and F.**

**Fig. S3 The N<sub>2</sub> adsorption-desorption isotherms of columns A, E, and F.**

**Fig. S4 The cross section image of the column.**

**Table S1 The column efficiency of day-to-day for benzene.**

**Table S2 The column efficiency of column-to-column for benzene.**

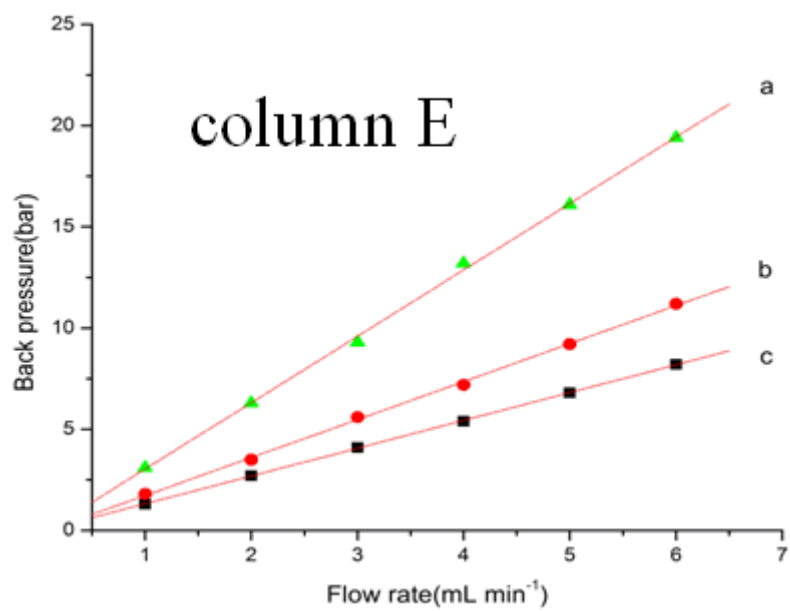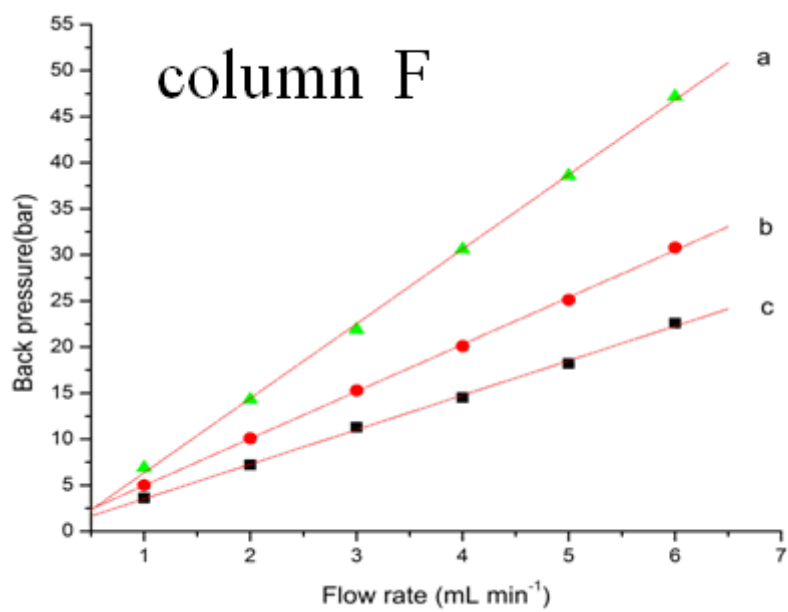

Fig. S1

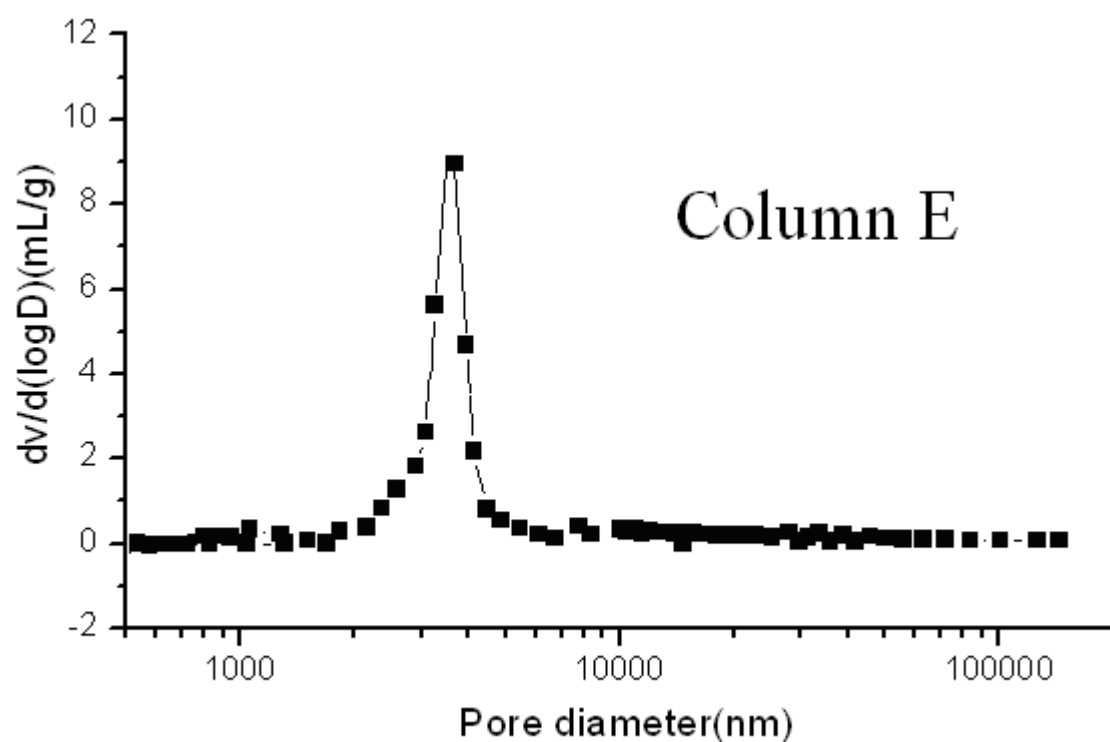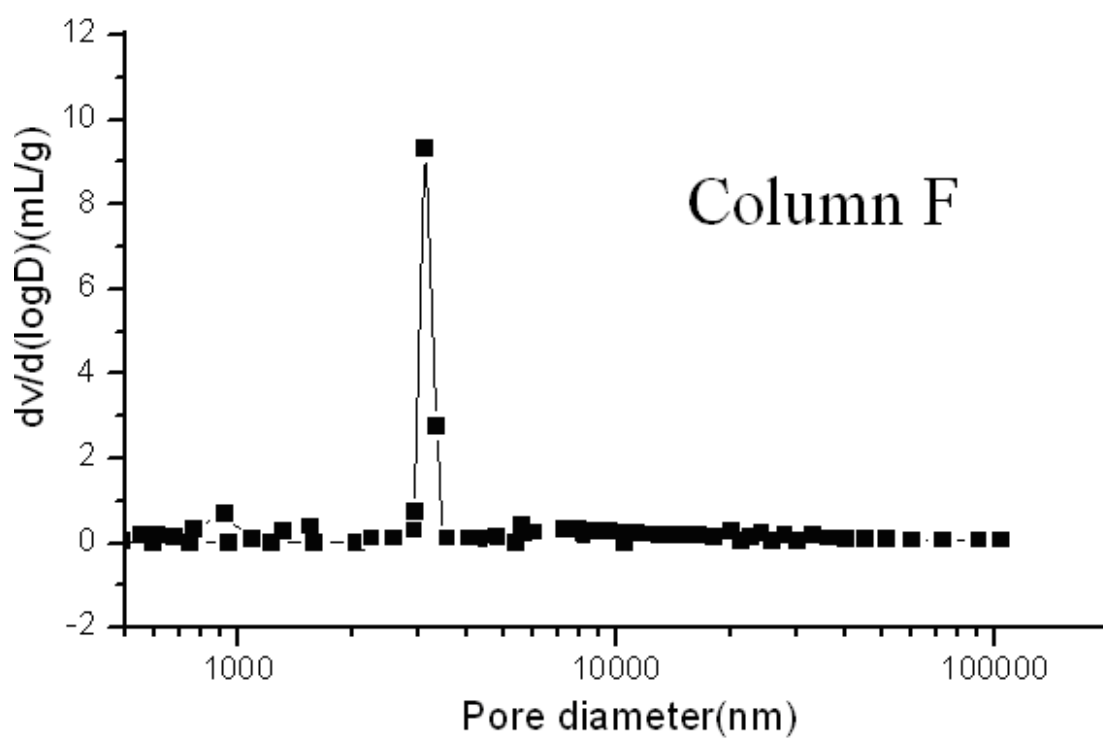

Fig. S2

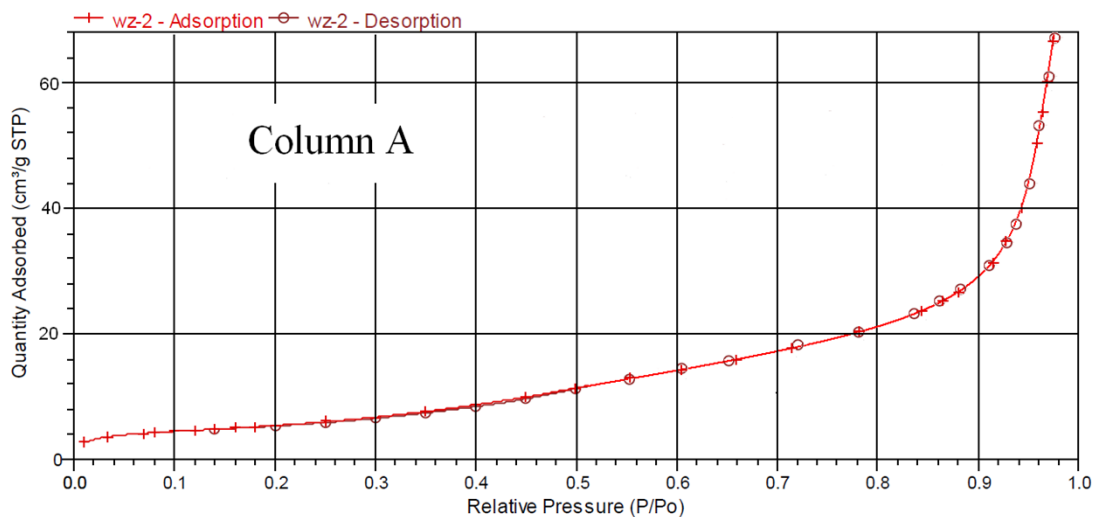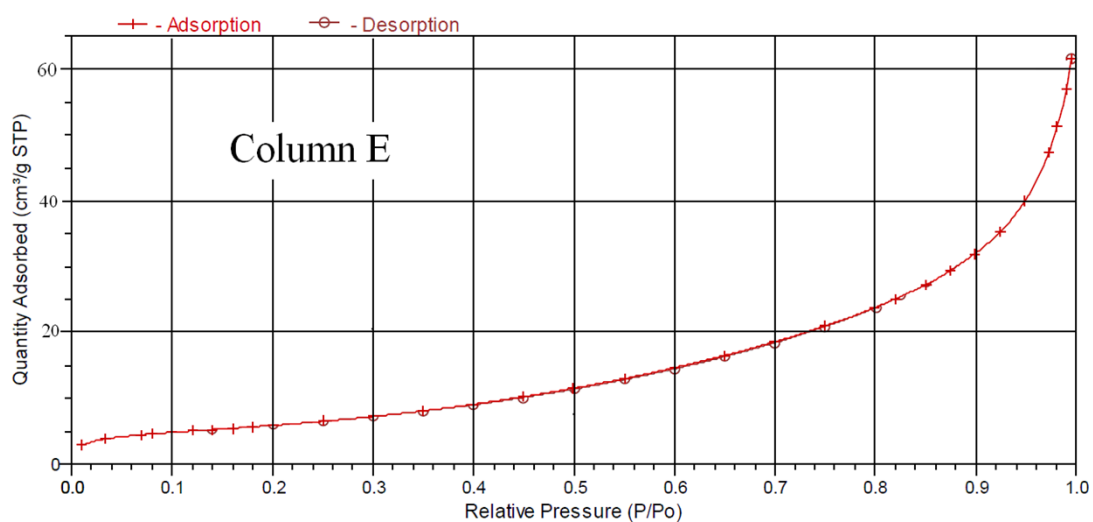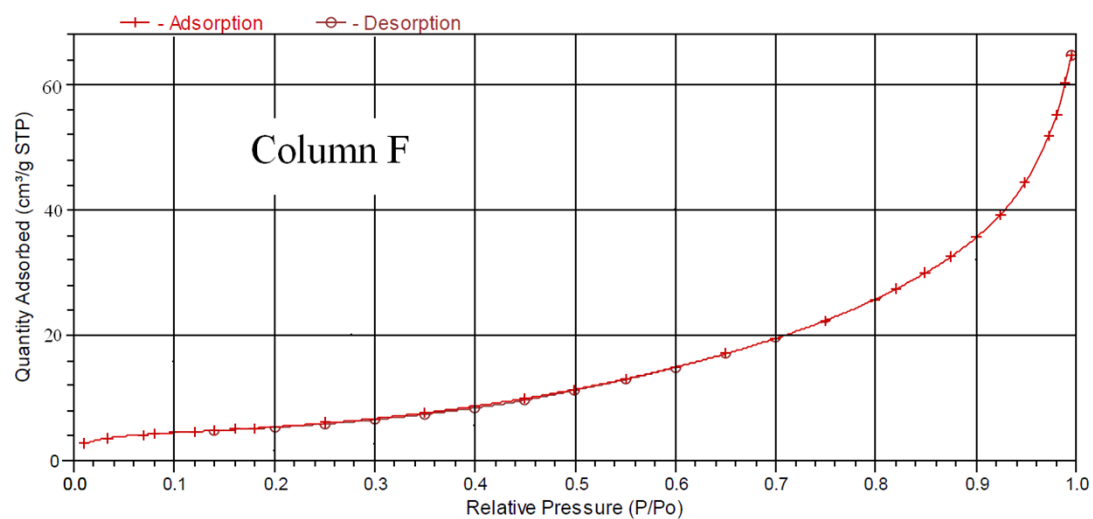

Fig. S3

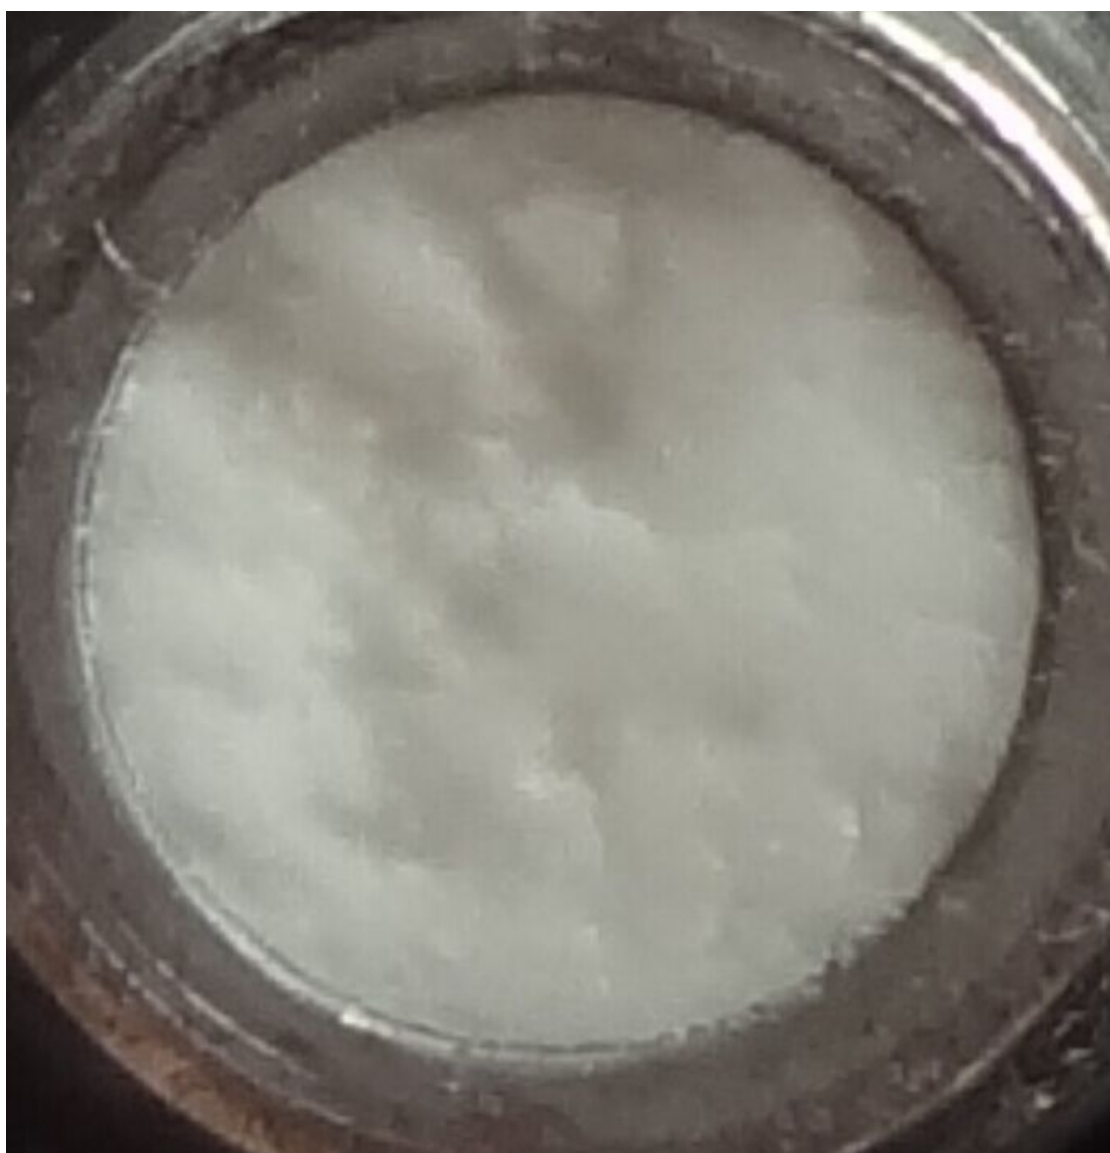

**Fig. S4**

**Table S1**

| Day | Plate numbers (plates m <sup>-1</sup> ) | The average value (plates m <sup>-1</sup> ) | RSD (%) |
|-----|-----------------------------------------|---------------------------------------------|---------|
| 1   | 12,620                                  |                                             |         |
| 2   | 12,560                                  |                                             |         |
| 3   | 12,540                                  | 12,520                                      | 5.7 %   |
| 4   | 12,510                                  |                                             |         |
| 5   | 12,460                                  |                                             |         |
| 6   | 12,420                                  |                                             |         |

<sup>a</sup> Chromatographic conditions— Mobile phase: MeOH/water (75/25, v/v), flow rate: 1.0 mL min<sup>-1</sup>, injection volume: 5.0 µL, detection wavelength: 254 nm, column temperature: 25 °C.

**Table S2**

| Column | Plate numbers (plates m <sup>-1</sup> ) | The average value (plates m <sup>-1</sup> ) | RSD (%) |
|--------|-----------------------------------------|---------------------------------------------|---------|
| 1      | 12,630                                  |                                             |         |
| 2      | 12,520                                  |                                             |         |
| 3      | 12,540                                  |                                             |         |
| 4      | 12,620                                  | 12,580                                      | 3.6 %   |
| 5      | 12,560                                  |                                             |         |
| 6      | 12,610                                  |                                             |         |

<sup>a</sup> Chromatographic conditions— Mobile phase: MeOH/water (75/25, v/v), flow rate: 1.0 mL min<sup>-1</sup>, injection volume: 5.0 μL, detection wavelength: 254 nm, column temperature: 25 °C.
